# Supplementary material for: Functional and evolutionary diversification of luciferase genes in Metridia lucens Boeck 1865
Source: Research Square preprint supplement (doi:10.21203/rs.3.rs-7525202/v1), 2025-09-29
Supplement: Supplementary file 1 [file 0bbe85599168746d0cb34596.pdf]

Supplemental Table 8. McDonald and Kreitman's test.

| Outgroup             | <i>MLuc1</i> |              | <i>MLuc2</i> |       | <i>MLuc3</i> |       |   |
|----------------------|--------------|--------------|--------------|-------|--------------|-------|---|
| <i>M. pacifica</i>   |              | <u>Fixed</u> | <u>Polym</u> |       |              |       |   |
|                      | Silent       | 38           | 27           | 22    | 13           | 28    | 5 |
|                      | Replacement  | 1            | 16           | 8     | 1            | 6     | 6 |
|                      | <i>p</i>     | 0,000        |              | 0,233 |              | 0,044 |   |
| <i>M. okhotensis</i> |              | <u>Fixed</u> | <u>Polym</u> |       |              |       |   |
|                      | Silent       | 67           | 27           | 43    | 16           | 35    | 7 |
|                      | Replacement  | 8            | 16           | 9     | 1            | 7     | 6 |
|                      | <i>p</i>     | 0,002        |              | 0,431 |              | 0,057 |   |
