# Supplementary material for: Functional and evolutionary diversification of luciferase genes in Metridia lucens Boeck 1865
Source: Research Square preprint supplement (doi:10.21203/rs.3.rs-7525202/v1), 2025-09-29
Supplement: Supplementary file 1 [file 9c23f1b45f3d325cfc09535f.xlsx]

## Sheet: Suppl. Table 1
Supplemental Table 1. MlLuc1 haplotypes obtained by means of PCR-cloning and Sanger sequencing (PCS).
							Exon 1				Intron 1						Exon 2									Intron 2
Haplotype	Pool 1	Pool 2	Ind. 1	Ind. 2	Ind. 3		16	28	30	84	100	109	127	137	138	144	188	227	228	242	244	245	249	253	254	281	282	294	300	356	357	358	359	360	361	362	363	364	365	366	367	368	369	370	371	372	373	374	375
PCS-M1.1	1		1				G	T	T	C	A	A	T	C	G	A	−	C	G	A	T	C	A	A	A	A	G	A	A	T	C	T	T	C	A	C	T	T	T	T	T	A	A	A	T	T	T	T	A
PCS-M1.2		1					.	.	.	.	.	.	.	.	.	.	−	.	.	.	.	.	.	.	.	.	.	.	.	.	.	.	.	.	.	.	.	.	.	.	.	.	.	.	.	.	.	.	.
PCS-M1.3		1					.	.	.	.	.	.	A	.	.	.	−	.	.	.	.	.	.	.	.	.	.	.	.	.	.	.	.	.	.	.	.	.	.	.	.	.	.	.	.	.	.	.	.
PCS-M1.4			1				.	.	.	.	.	.	.	.	.	.	−	.	.	.	.	.	.	.	.	.	.	.	.	.	.	.	.	.	.	.	.	.	.	.	.	.	.	.	.	.	.	.	.
PCS-M1.5	1						.	.	.	.	.	G	.	.	A	.	−	T	.	T	C	.	.	G	.	.	.	.	.	.	.	.	.	.	.	.	.	.	.	.	.	.	.	.	.	.	.	.	.
PCS-M1.6	1						.	.	.	.	.	.	.	.	.	.	−	.	.	T	C	.	.	G	.	.	.	.	.	.	.	.	.	.	.	.	.	.	.	.	.	.	.	.	.	.	.	.	.
PCS-M1.7		1					.	.	.	.	.	.	.	T	.	C	−	.	.	T	C	.	.	G	.	.	A	.	.	.	.	.	.	.	.	.	.	.	.	.	.	.	.	.	.	.	.	.	.
PCS-M1.8			1				.	.	.	A	.	.	.	.	.	.	A	.	.	T	C	.	.	.	.	.	.	.	G	.	.	.	.	.	.	.	.	.	.	.	.	.	.	.	.	.	.	.	.
PCS-M1.9		1					.	C	C	.	.	.	.	.	.	.	−	.	A	T	.	.	.	G	.	.	.	.	.	.	.	.	.	.	.	.	.	.	.	.	.	.	.	.	.	.	.	.	.
PCS-M1.10	1						.	.	.	.	.	.	.	.	.	.	−	.	.	T	.	G	G	G	.	.	.	.	.	−	−	−	−	−	−	−	−	−	−	−	−	−	−	−	−	−	−	−	−
PCS-M1.11	1						.	.	.	.	.	.	.	.	.	.	−	.	.	T	.	.	G	G	.	.	.	C	.	.	.	.	.	.	.	.	.	.	.	.	.	.	.	.	.	.	.	.	.
PCS-M1.12		1					.	.	.	.	.	.	.	T	.	.	−	T	.	T	.	.	G	G	.	.	.	.	.	.	.	.	.	.	.	.	.	.	.	.	.	.	.	.	.	.	.	.	.
PCS-M1.13				1			.	.	.	.	.	.	.	T	.	.	−	.	.	T	.	.	G	G	.	.	.	.	.	.	.	.	.	.	.	.	.	.	.	.	.	.	.	.	.	.	.	.	.
PCS-M1.14					1		.	.	.	.	.	.	.	.	.	.	−	.	.	T	.	.	G	G	.	C	.	.	.	.	.	.	.	.	.	.	.	.	.	.	.	.	.	.	.	.	.	.	.
PCS-M1.15	1						A	.	.	.	G	.	.	.	.	.	−	T	.	T	.	.	G	G	T	.	.	.	.	.	.	.	.	.	.	.	.	.	.	.	.	.	.	.	.	.	.	.	.
Note: Haplotype names include PCS- to indicate that were obtained using PCR-cloning and Sanger sequencing;
Plain text, synonymous or intron (silent) mutation; Bold, nonsynonymous mutation; Red, nonsense*/ frameshift mutation;
Ligh grey cell, exon; dot, same as first sequence; ̶ , deletion. Vertical discontinuous lines indicate the limits of the region with available MPS data.
Rows indicate name, number of clones and sequence variants of each haplotype.
[truncated: 104 more columns]
