# Supplementary material for: Functional and evolutionary diversification of luciferase genes in Metridia lucens Boeck 1865
Source: Research Square preprint supplement (doi:10.21203/rs.3.rs-7525202/v1), 2025-09-29
Supplement: Supplementary file 3 [file dfcd6ecc32c7e05aeea86805.pdf]

Supplemental Table 2. Genetic diversity,  $\pi$  (JC) in %, at silent and nonsynonymous sites across *Luc* genes in *M. lucen* s.

| Gene            | <i>S</i> | Silent   |          |              |          | Nonsynonymous |          |              |          |
|-----------------|----------|----------|----------|--------------|----------|---------------|----------|--------------|----------|
|                 |          | <i>L</i> | <i>N</i> | $\pi_s$ (JC) | <i>D</i> | <i>L</i>      | <i>N</i> | $\pi_A$ (JC) | <i>D</i> |
| MI <i>Luc</i> 1 | 16       | 297,1    | 27       | 16,0         | -1,82 *  | 345,9         | 16       | 0,8          | -1,81 *  |
| MI <i>Luc</i> 2 | 7        | 372,1    | 16       | 15,6         | -0,69    | 344,9         | 1        | 0,1          | -1,01    |
| MI <i>Luc</i> 3 | 11       | 278,5    | 8        | 13,0         | 1,01     | 298,5         | 6        | 0,7          | 0,15     |

*S*, number of sequences; *L*, number of sites; *N*, number of mutations, *D*, Tajima's *D*.
