# Supplementary material for: Functional and evolutionary diversification of luciferase genes in Metridia lucens Boeck 1865
Source: Research Square preprint supplement (doi:10.21203/rs.3.rs-7525202/v1), 2025-09-29
Supplement: Supplementary file 4 [file f55ba62a0068b96e15cce9f4.pdf]

Supplemental Table 7. Estimates (in %) of nucleotide divergence at synonymous ( $K_S$ ) and nonsynonymous ( $K_A$ ) sites (below and above the diagonal) across Luc genes and species.

|               | <i>MLuc1</i> | <i>MpLuc1</i> | <i>MoLuc1</i> | <i>MLuc2</i> | <i>MpLuc2</i> | <i>MoLuc2</i> | <i>MLuc3</i> |
|---------------|--------------|---------------|---------------|--------------|---------------|---------------|--------------|
| <i>MLuc1</i>  | -            | 1,1           | 3,0           | 18,2         | 18,5          | 18,7          | 23,5         |
| <i>MpLuc1</i> | 11,6         | -             | 2,5           | 18,5         | 18,2          | 19,0          | 23,9         |
| <i>MoLuc1</i> | 25,4         | 26,1          | -             | 19,3         | 18,8          | 19,6          | 24,6         |
| <i>MLuc2</i>  | 78,4         | 96,0          | 84,9          | -            | 2,85          | 3,3           | 3,5          |
| <i>MpLuc2</i> | 83,0         | 100,4         | 78,0          | 7,8          | -             | 3,0           | 2,9          |
| <i>MoLuc2</i> | 78,5         | 86,1          | 67,3          | 18,1         | 19,2          | -             | 2,7          |
| <i>MLuc3</i>  | 84,1         | 94,5          | 81,3          | 16,4         | 18,8          | 14,9          | -            |
